# Supplementary material
Source: Springer Nature journal article supplement (https://www.springermedizin.de/resource/supplementary/12889_2013_5789_MOESM1_ESM.pdf/9496734)
Supplement: MOESM1 [file 9496734]

|                                |                         |
|--------------------------------|-------------------------|
| <b>DATABASE</b>                | PubMed                  |
| <b>DATE OF ORIGINAL SEARCH</b> | October 2011            |
| <b>TOTAL # RESULTS</b>         | 25145                   |
| <b>DATE RANGE FOR SEARCH</b>   | ALL AVAILABLE YEARS     |
| <b>LOCATION</b>                | ALL AVAILABLE LOCATIONS |
| <b>HEALTH OUTCOME</b>          | Probiotics              |

**Search terms:**

"Probiotics"[Mesh] OR "Probiotics"[All Fields] OR "Probiotic"[All Fields] OR "lactobacillus"[MeSH Terms] OR "lactobacillus"[Text Word] OR "lactobacilli"[Text Word] OR "betabacterium"[All Fields] OR "lactobacillae"[All Fields] OR "lactobacilleae"[All Fields] OR "lactobacteria" OR "Lactobacillus acidophilus"[Mesh] OR "Lactobacillus acidophilus"[All Fields] OR "Lactobacillus casei"[Mesh] OR "Lactobacillus casei"[All Fields] OR "Lactobacillus delbrueckii"[Mesh] OR "Lactobacillus delbrueckii"[All Fields] OR "Lactobacillus fermentum"[Mesh] OR "Lactobacillus fermentum"[All Fields] OR "Lactobacillus helveticus"[Mesh] OR "Lactobacillus helveticus"[All Fields] OR "Lactobacillus leichmannii"[Mesh] OR "Lactobacillus leichmannii"[All Fields] OR "Lactobacillus plantarum"[Mesh] OR "Lactobacillus plantarum"[All Fields] OR "Lactobacillus reuteri"[Mesh] OR "Lactobacillus reuteri"[All Fields] OR "Lactobacillus rhamnosus"[Mesh] OR "Lactobacillus rhamnosus"[All Fields]

|                                |                         |
|--------------------------------|-------------------------|
| <b>DATABASE</b>                | PubMed                  |
| <b>DATE OF ORIGINAL SEARCH</b> | October 2011            |
| <b>TOTAL # RESULTS</b>         | 216408                  |
| <b>DATE RANGE FOR SEARCH</b>   | ALL AVAILABLE YEARS     |
| <b>LOCATION</b>                | ALL AVAILABLE LOCATIONS |
| <b>HEALTH OUTCOME</b>          | Diarrhea                |

**Search terms:**

("Diarrhea"[Mesh] OR "Diarrhea" [All Fields] OR "Dysentery"[Mesh] OR "Dysentery"[All fields] OR "Gastroenteritis"[Mesh] OR "gastroenteritis"[All fields] OR "gastroenteritides"[All fields] OR "diarrhoeal disease"[All fields] OR "diarrhoeal diseases"[All fields] OR "enteritis"[All Fields] OR "Diarrheal Disease"[All fields] OR "Diarrheal Diseases"[All fields] OR "diarrheas"[All fields] OR "diarrhoea"[All Fields] OR "diarrhoeas"[All Fields] OR "gastrointestinal infection"[All Fields] OR "gastrointestinal infections"[All Fields] OR "Diarrhea, Infantile"[Mesh])

|                                |                         |
|--------------------------------|-------------------------|
| <b>DATABASE</b>                | PubMed                  |
| <b>DATE OF ORIGINAL SEARCH</b> | October 2011            |
| <b>TOTAL # RESULTS</b>         | 2038                    |
| <b>DATE RANGE FOR SEARCH</b>   | ALL AVAILABLE YEARS     |
| <b>LOCATION</b>                | ALL AVAILABLE LOCATIONS |
| <b>HEALTH OUTCOME</b>          | Diarrhea + Probiotics   |

**Search terms:**

("Diarrhea"[Mesh] OR "Diarrhea" [All Fields] OR "Dysentery"[Mesh] OR "Dysentery"[All fields] OR "Gastroenteritis"[Mesh] OR "gastroenteritis"[All fields] OR "gastroenteritides"[All fields] OR "diarrhoeal disease"[All fields] OR "diarrhoeal diseases"[All fields] OR "enteritis"[All Fields] OR "Diarrheal Disease"[All fields] OR "Diarrheal Diseases"[All fields] OR "diarrheas"[All fields] OR "diarrhoea"[All Fields] OR "diarrhoeas"[All Fields] OR "gastrointestinal infection"[All Fields] OR "gastrointestinal infections"[All Fields] OR "Diarrhea, Infantile"[Mesh]) AND ("Probiotics"[Mesh] OR "Probiotics"[All Fields] OR "Probiotic"[All Fields] OR "lactobacillus"[MeSH Terms] OR "lactobacillus"[Text Word] OR "lactobacilli"[Text Word] OR "betabacterium"[All Fields] OR "lactobacileae"[All Fields] OR "lactobacilleae"[All Fields] OR "lactobacteria" OR "Lactobacillus acidophilus"[Mesh] OR " acidophilus"[All Fields] OR "Lactobacillus casei"[Mesh] OR " casei"[All Fields] OR "Lactobacillus delbrueckii"[Mesh] OR " delbrueckii"[All Fields] OR "Lactobacillus fermentum"[Mesh] OR " fermentum"[All Fields] OR "Lactobacillus helveticus"[Mesh] OR " helveticus"[All Fields] OR "Lactobacillus leichmannii"[Mesh] OR " leichmannii"[All Fields] OR "Lactobacillus plantarum"[Mesh] OR " plantarum"[All Fields] OR "Lactobacillus reuteri"[Mesh] OR " reuteri"[All Fields] OR "Lactobacillus rhamnosus"[Mesh] OR " rhamnosus"[All Fields]) NOT (animals[mh] NOT humans[mh])

\*The above search terms were used in the original search (October 2011) and the updated search (December 2012).

**Supplementary table. Excluded full-text articles by reason for exclusion**

| <b>Reason for exclusion</b>                | <b>Number of studies</b> | <b>Percentage (%)</b> |
|--------------------------------------------|--------------------------|-----------------------|
| Antibiotics                                | 9                        | 7.1                   |
| Breastfeeding                              | 15                       | 11.9                  |
| Did not evaluate probiotics alone          | 8                        | 6.3                   |
| Excluded specific etiologies               | 13                       | 10.3                  |
| No proper control group                    | 13                       | 10.3                  |
| Not RCT                                    | 22                       | 17.5                  |
| Not acute diarrhea or diarrhea not defined | 22                       | 17.5                  |
| Study population >5 yrs                    | 8                        | 6.3                   |
| Poor methodological quality                | 16                       | 12.7                  |
| <b>Total excluded based on full-text</b>   | <b>126</b>               |                       |
